# Supplementary material for: Bioactive Potential of Minor Italian Olive Genotypes from Apulia, Sardinia and Abruzzo
Source: MDPI journal article supplement (doi:10.3390/foods10061371), 2021-06-14
Supplement: s1 [file s1]

**Figure S1.** Example of SSR electropherograms. The molecular profile of microsatellite DCA18 identified in all the analysed olive cultivars is reported. Double or single peaks correspond to heterozygous or homozygous profiles, respectively.

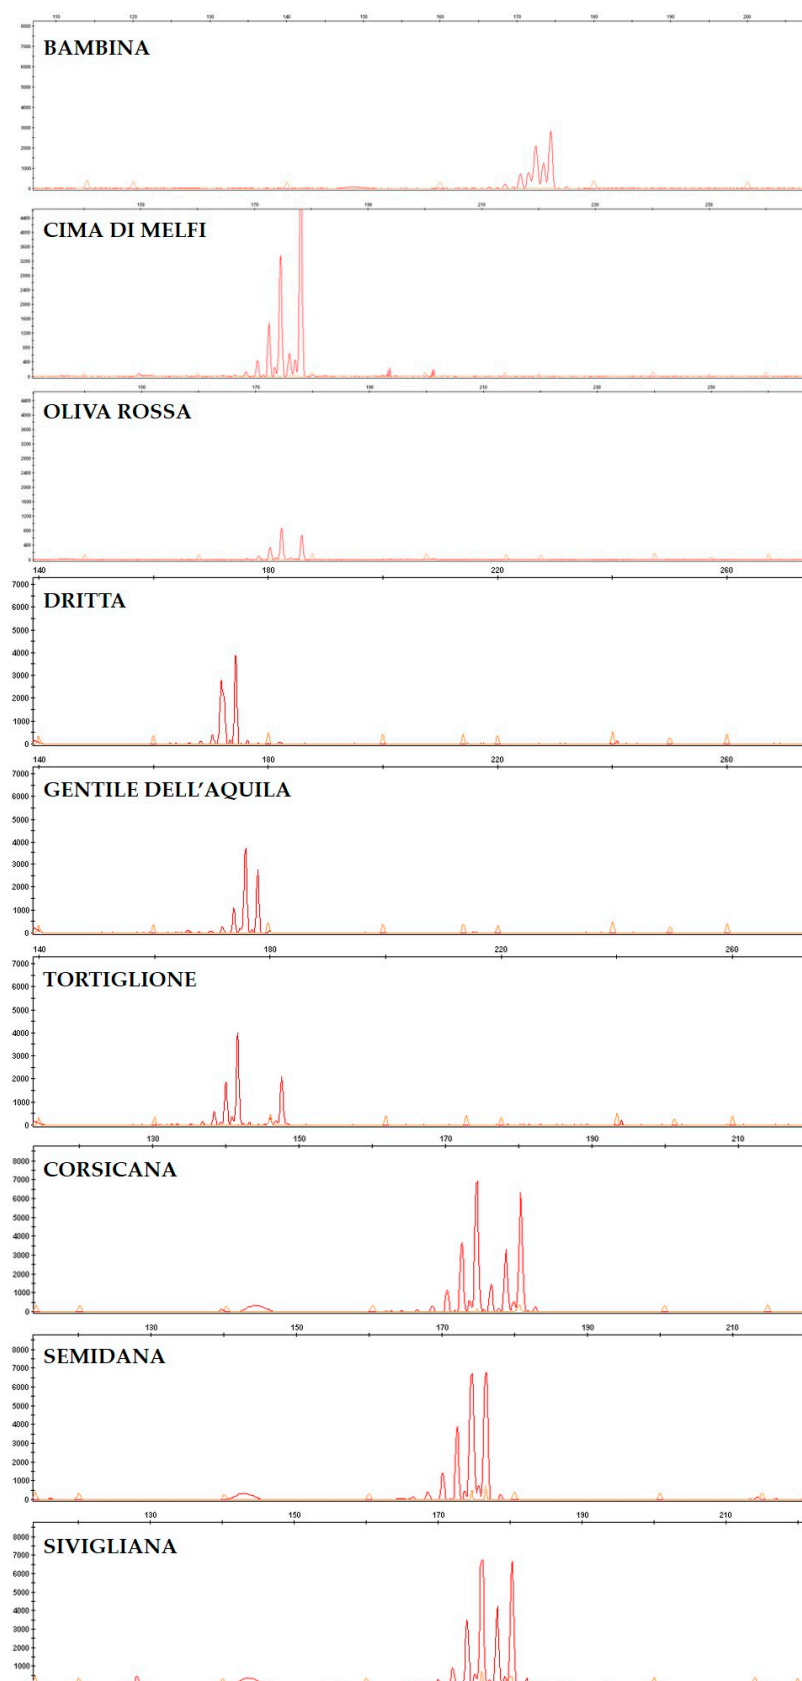

**Table S1.** Microsatellite markers used in this study. Locus name, repeat motif, primer sequences, annealing temperature (Ta) and allele sizing range (in base pairs, bp) are reported.

| SSR<br>locus | Repeat motif                                                 | Primer sequence<br>(5'→3')                              | Ta<br>(°C) | Allele size<br>(bp) | Reference |
|--------------|--------------------------------------------------------------|---------------------------------------------------------|------------|---------------------|-----------|
| DCA03        | (GA) <sub>19</sub>                                           | CCCAAGCGGAGGTGTATATTGTTAC<br>TGCTTTTGTGTTGAGATGTTG      | 50         | 229-257             | [52]      |
| DCA05        | (GA) <sub>15</sub>                                           | AACAAATCCCATACGAACTGCC<br>CGTGTGCTGTGAAGAAAATCG         | 50         | 194-214             | [52]      |
| DCA09        | (GA) <sub>23</sub>                                           | AATCAAAGTCTTCCTTCTCATTTTCG<br>GATCCTTCCAAAAGTATAACCTCTC | 55         | 162-210             | [52]      |
| DCA13        | (CA) <sub>15</sub>                                           | GATCAGATTAATGAAGATTTGGG<br>AACTGAACCTGTGTATCTTGCATCC    | 55         | 110-160             | [52]      |
| DCA15        | (CA) <sub>3</sub> G(AC) <sub>14</sub>                        | GATCTGTCTGTATATCCACAC<br>TATACCTTTTCCATCTTGACGC         | 50         | 246-273             | [52]      |
| DCA17        | (GT) <sub>9</sub> (AT) <sub>7</sub> AGATA(AGA) <sub>38</sub> | GATCAAATTCTACAAAAATATA<br>TAATTTTGGCACGTAGTATTGG        | 50         | 107-217             | [52]      |
| DCA18        | (CA) <sub>4</sub> CT(CA) <sub>3</sub> (GA) <sub>19</sub>     | AAGAAAGAAAAAGGCAGAATTAAGC<br>GTTTTCTGTCTCTACATAAGTGAC   | 50         | 159-201             | [52]      |
| GAPU45       | (AG) <sub>7</sub>                                            | ATCGGGAGGGATGTGATGTA<br>CATCGCATCGCCTGTAAATA            | 57-60      | 181-195             | [53]      |
| GAPU71b      | GA(AG) <sub>6</sub> (AAG) <sub>8</sub>                       | GATCAAAGGAAGAAGGGGATAAA<br>ACAACAAATCCGTACGCTTG         | 57-60      | 118-144             | [53]      |
| GAPU101      | (GA) <sub>8</sub> (G) <sub>3</sub> (AG) <sub>3</sub>         | CATGAAAGGAGGGGGACATA<br>GGCACTGTGTGTCAGATTG             | 57-60      | 182-219             | [53]      |
| EMO90        | (AC) <sub>10</sub>                                           | CATCCGGATTTCTTGCTTTT<br>AGCGAATGTAGCTTTGCATGT           | 50         | 174-200             | [54]      |
| EMOL         | (GA) <sub>12</sub>                                           | CTTTCCAATATGGGC<br>ATGGCACTTTACGGGAAAAA                 | 50         | 190-214             | [54]      |

**Table S2.** List of primers utilized for qRT-PCR analysis.

| Gene           | Accession number | Primer sequence (5'→3')                           | Amplicon size (bp) | Reference |
|----------------|------------------|---------------------------------------------------|--------------------|-----------|
| OeTYRD         | JX266195         | TGGATCTGACCAAACCCACT<br>TTAACCCGAATGCAGTAGCC      | 110                | [40]      |
| OeCuAO         | GQ851613         | AAGATGGCCTTGGGAAGAAT<br>TTCTGCCAATCCTGTTCTCC      | 191                | [40]      |
| OeALDH         | JX266197         | TTTAAGTGGGGAGCTCAAATACA<br>GATGCTTCAGATATTCCCATGC | 200                | [40]      |
| OeEF1 $\alpha$ | AM946404         | ACCACTGGTGGTTTTGAAGC<br>GAAACCAGAGATGGGGACAA      | 234                | [40]      |
